# Supplementary material for: Intronic motif pairs cooperate across exons to promote pre-mRNA splicing
Source: Springer Nature journal article supplement (doi:10.1186/gb-2010-11-8-r84), 2010-08-12
Supplement: 13059_2010_2377_MOESM5_ESM.pdf [file 13059_2010_2377_MOESM5_ESM.pdf]

|                               |  | UpDp                          | UpDd                          | UdDp                          | UdDd                          |
|-------------------------------|--|-------------------------------|-------------------------------|-------------------------------|-------------------------------|
| <b>Constitutive exon</b>      |  | 58                            | 37                            | 71                            | 45                            |
| <b>Shuffled intron</b>        |  | 0.4<br>1 0 0 0 1<br>0 0 0 0 2 | 0.8<br>0 1 0 0 1<br>3 0 0 1 2 | 1.4<br>2 2 0 1 1<br>3 1 1 0 3 | 0.9<br>0 1 1 0 1<br>0 2 3 0 1 |
| <b>Pseudo exon</b>            |  | 2                             | 4                             | 3                             | 4                             |
| <b>Upstream pseudo site</b>   |  | 1                             | 0                             | 1                             | 3                             |
| <b>Downstream pseudo site</b> |  | 1                             | 1                             | 0                             | 1                             |
| <b>Alternative exon</b>       |  | 28                            | 48                            | 29                            | 16                            |
