# Supplementary material for: Intronic motif pairs cooperate across exons to promote pre-mRNA splicing
Source: Springer Nature journal article supplement (doi:10.1186/gb-2010-11-8-r84), 2010-08-12

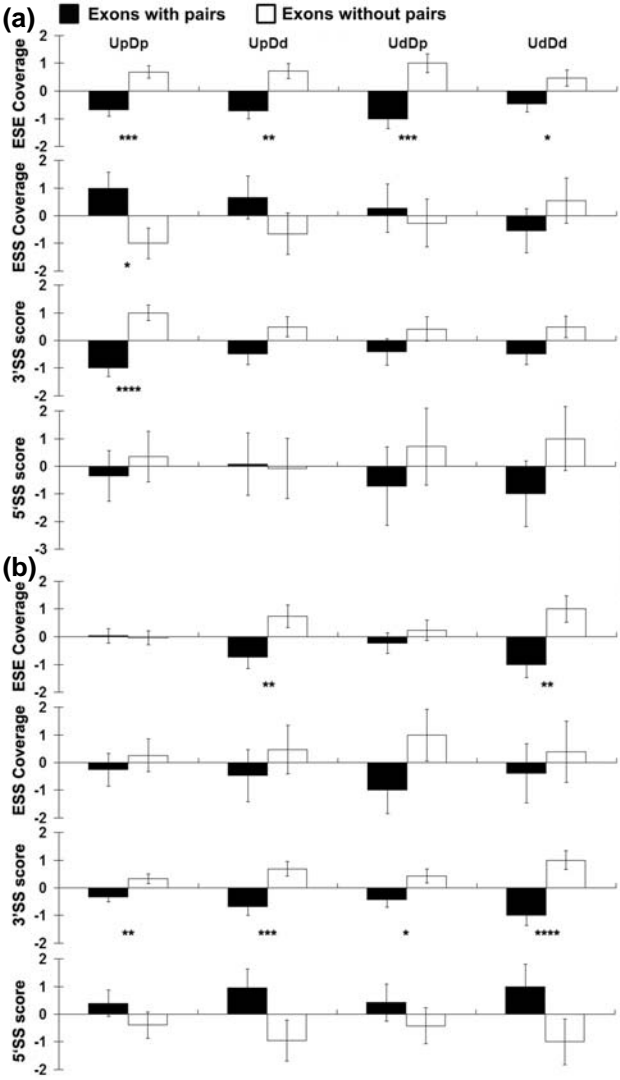

Supplement: 13059_2010_2377_MOESM10_ESM.pdf [file 13059_2010_2377_MOESM10_ESM.pdf]
