# Supplementary material for: Intronic motif pairs cooperate across exons to promote pre-mRNA splicing
Source: Springer Nature journal article supplement (doi:10.1186/gb-2010-11-8-r84), 2010-08-12
Supplement: 13059_2010_2377_MOESM12_ESM.pdf [file 13059_2010_2377_MOESM12_ESM.pdf]

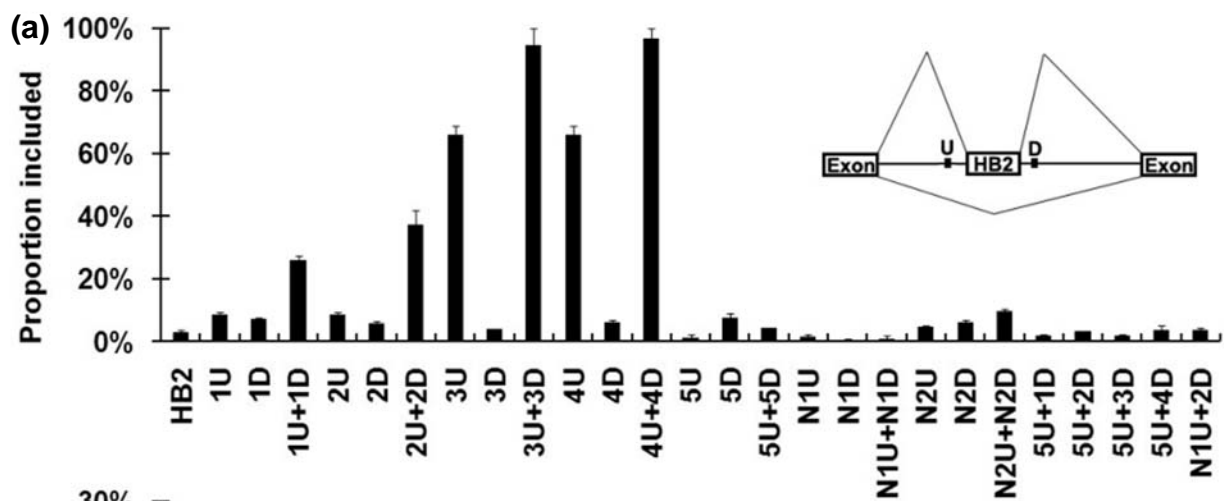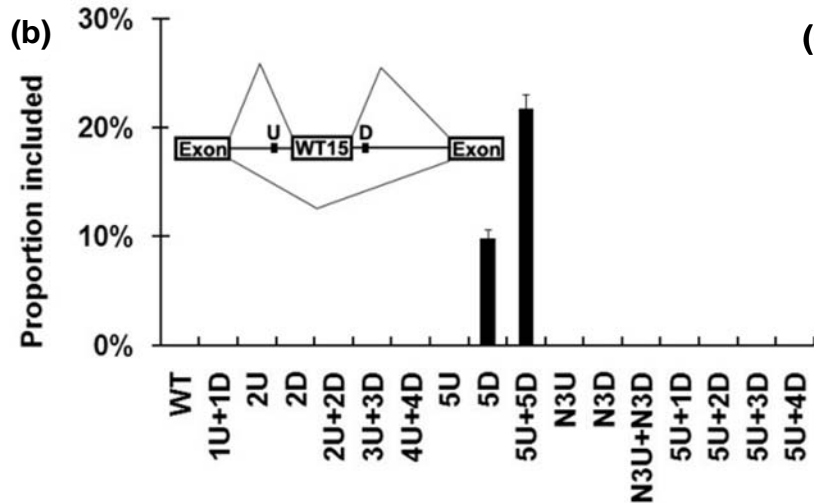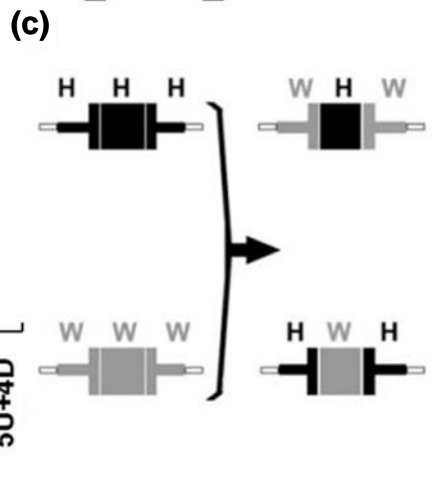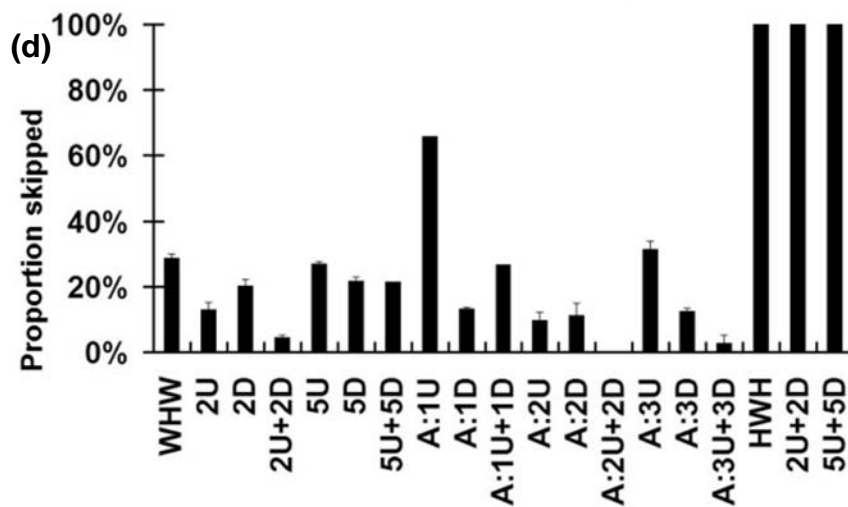

**(e)**

| Hb2     | SI    | WT1-5   | SI    |
|---------|-------|---------|-------|
| 1U+1D   | -0.14 | 2U+2D   | 0.00  |
| 2U+2D   | -0.27 | 5U+5D   | -0.12 |
| 3U+3D   | -0.29 | N3U+N3D | 0.00  |
| 4U+4D   | -0.31 | 5U+1D   | 0.00  |
| 5U+5D   | 0.02  | 5U+2D   | 0.00  |
| N1U+N1D | -0.02 | 5U+3D   | 0.00  |
| N2U+N2D | -0.02 | 5U+4D   | 0.00  |
| 5U+1D   | 0.04  | WHW     | SI    |
| 5U+2D   | 0.01  | 2U+2D   | -0.16 |
| 5U+3D   | 0.00  | 5U+5D   | 0.04  |
| 5U+4D   | 0.01  | A:1U+1D | -0.13 |
| N1U+2D  | 0.01  | A:2U+2D | -0.13 |
|         |       | A:3U+3D | -0.39 |
